# Supplementary material
Source: HighWire-hosted journal article supplement (https://bmjopen.bmj.com/content/9/9/e030635)
Supplement: inline-supplementary-material-2 [file inline-supplementary-material-2.pdf]

**Supplementary Information - Timing and duration of intervention components (SToP activities)****Surveillance ('See'):**

Clinic staff, school staff, school-aged children and community researchers are exposed to surveillance activities from baseline to maintenance phases. For each community, surveillance will be completed over a period of 1-2 days. Surveillance will be repeated six times during the intervention (visits 3 to 8 over 2 years; Figure 1) and once in the maintenance (visit 9; Figure 1).

**Training ('See'):**

Clinic staff, school staff, environmental health staff and community researchers are exposed to training at switchover. Clinic, school, and environmental health staff and community researchers training will start in Step One (visit 3; Figure 1) for the first two clusters and Step Two (visit 6; Figure 1) for the remaining clusters. Training is repeated during surveillance activities in subsequent visits, concluding at the end of Step Two (visit 8; Figure 1). Training sessions in each community will range from a minimum of one hour to a maximum of two days (including the community-dermatology model component completing during surveillance) depending on clinical staff availability and other priorities.

**Treatment ('Treat'):**

School-aged children identified during surveillance as requiring treatment are exposed to SToP streamlined treatment regimens at switchover, via referral to the clinic. Community members are exposed at switchover as the clinic adopts the SToP trial treatment regimens. Exposure for both groups will continue into the maintenance phase (visit 9; Figure 1).

**Health promotion and environmental health activities ('Prevent'):**

Community members, clinic staff, school staff and school-aged children are exposed to some health promotion from the consultation phase, due to the presence of research processes such as informed consent raising awareness of skin health, and in keeping with Participatory Action Research methodologies required to co-design targeted SToP prevention activities. Clinic staff, school staff, school-aged children and community members are exposed to targeted SToP health promotion and environmental health activities, developed in partnership with each community, at switchover. These will continue into the maintenance phase (visit 9; Figure 1).

**Figure 1: Trial structure and timeline using a stepped-wedge design.**

White - pre-intervention phase, when communities will receive standard care through the clinic, and school-based surveillance programs study visits will establish baseline prevalence (study visit 1 and 2). School-based surveillance will continue for all community clusters in study visits 3-9, irrespective of intervention status. Orange - two community clusters transition to the SToP activities (intervention). Brown – remaining two clusters transition to the SToP activities. Yellow - maintenance activities for all community clusters (an enhanced business as usual approach, where we expect communities will continue to use the SToP trial resources and processes but without further education and input from the trial team). School-based surveillance and SToP activity measurement will cease in year 4, but routinely collected data from clinics and hospital records will continue to be collected to investigate the longer-term impact of the intervention in the absence of regular school-based surveillance and to evaluate the intervention effectiveness on indicators of chronic disease.

| Dates & School Terms              | Apr-Jun 2019 (Term 2)        | July-Sep 2019 (Term 3)     | Oct-Dec 2019 (Term 4)        |   | Apr-Jun 2020 (Term 2)    | July-Sep 2020 (Term 3)   | Oct-Dec 2020 (Term 4)        |   | Apr-Jun 2021 (Term 2)    | July-Sep 2021 (Term 3)   | Oct-Dec 2021 (Term 4)     | Jan-Dec 2022                                          |
|-----------------------------------|------------------------------|----------------------------|------------------------------|---|--------------------------|--------------------------|------------------------------|---|--------------------------|--------------------------|---------------------------|-------------------------------------------------------|
| Time point                        | 1                            | 2                          | 3                            | 4 | 5                        | 6                        | 7                            | 8 | 9                        | 10                       | 11                        | NA                                                    |
| Study Visit (school surveillance) | 1                            | 2                          | 3                            |   | 4                        | 5                        | 6                            |   | 7                        | 8                        | 9                         | NA                                                    |
| Time window Study Phase           | Year 1 <u>Start Baseline</u> | Year 1 <u>End Baseline</u> | Year 1 <u>[Start Step 1]</u> |   | Year 2 <u>Mid Step 1</u> | Year 2 <u>End Step 1</u> | Year 2 <u>[Start Step 2]</u> |   | Year 3 <u>Mid Step 2</u> | Year 3 <u>End Step 2</u> | Year 3 <u>Maintenance</u> | Year 4 <u>Ongoing Maintenance &amp; Data Analysis</u> |
| Community Cluster 1               |                              |                            |                              |   |                          |                          |                              |   |                          |                          |                           |                                                       |
| Community Cluster 2               |                              |                            |                              |   |                          |                          |                              |   |                          |                          |                           |                                                       |
| Community Cluster 3               |                              |                            |                              |   |                          |                          |                              |   |                          |                          |                           |                                                       |
| Community Cluster 4               |                              |                            |                              |   |                          |                          |                              |   |                          |                          |                           |                                                       |
